# Supplementary material for: The underlying molecular mechanism of topical fluid foam with microsphere assistance
Source: Royal Society of Chemistry journal article supplement (doi:10.1039/d4nj02223h), 2024-01-01
Supplement: d4nj02223h1.pdf [file d4nj02223h1.pdf]

### Underlying molecular mechanism of topical fluid foam with microsphere assistance

Chunbao Du,<sup>\*a</sup> Zichun Feng,<sup>a</sup> Changji Yin,<sup>b,c</sup> Xingang Jia,<sup>a</sup> Yameng Zhao,<sup>a</sup> and Yuan Cheng<sup>\*b,c</sup>

College of Chemistry and Chemical Engineering, Xi'an Shiyou University, Xi'an 710065, P. R.

China. Email: duchunbao@xsyu.edu.cn

Suzhou Industrial Park Monash Research Institute of Science and Technology, Monash University,

Suzhou 215000, P. R. China. Email: yuan.cheng@monash.edu

Department of Materials Science and Engineering, Monash University, Clayton, VIC 3800,

Australia

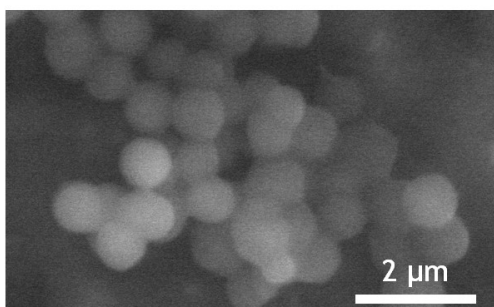

Fig. S1 ESEM image of  $RM_1$  in the presence of water molecules

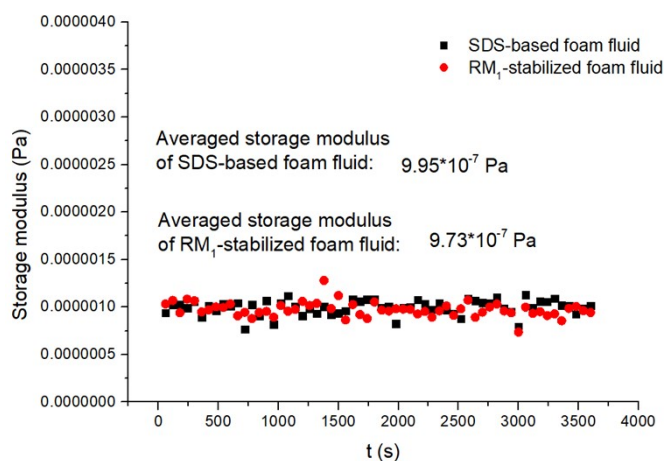

Fig. S2 Elastic moduli of fluid foam in the presence or absence of  $RM_1$

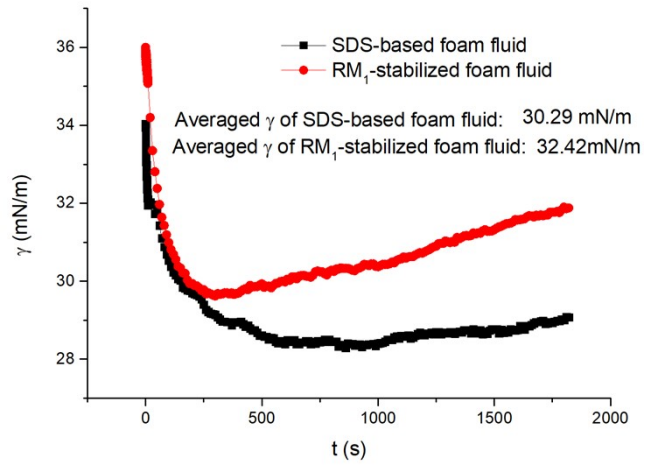

Fig. S3 Interfacial tension of fluid foam in the presence or absence of  $RM_1$
